# Supplementary material for: Ecological and Health Risks Attributed to Rare Earth Elements in Coal Fly Ash
Source: MDPI journal article supplement (doi:10.3390/toxics12010071), 2024-01-15
Supplement: s1 [file s1]

# Supplementary Materials: Ecological and Health Risks Attributed to Rare Earth Elements in Coal Fly Ash

Latinka Slavković-Beškoski, Ljubiša Ignjatović, Mirjana Čujić, Jelena Vesković, Katarina Trivunac, Jelena Stojaković, Aleksandra Perić-Grujić, Antonije Onjia

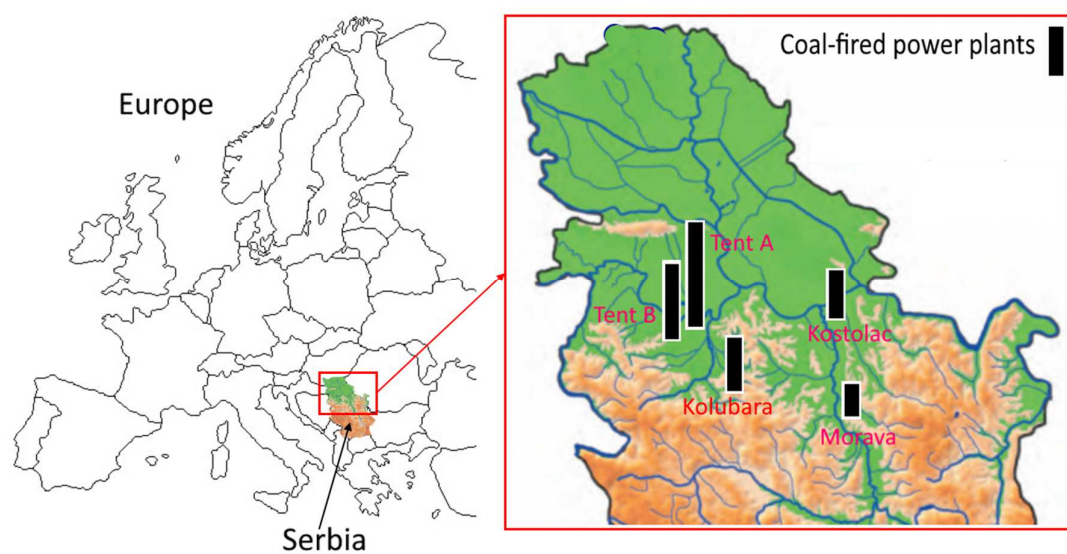

Figure S1. Map of sampling locations.

Table S1. Validation parameters of REY, HMs, and major elements in CFA samples using ICP-MS. The method detection limit (MDL), calibration equation, correlation coefficient ( $r^2$ ), recovery (R), and relative standard deviation (RSD).

| Element           | A+B·x           | $r^2$  | MDL<br>(mg/kg) | R<br>(%) | RSD<br>(%) | NIST 1633c<br>(mg/kg) |
|-------------------|-----------------|--------|----------------|----------|------------|-----------------------|
| <sup>140</sup> Ce | 229 + 331929·x  | 0.9994 | 0.005          | 87       | 9.2        | 180                   |
| <sup>163</sup> Dy | 3.41 + 143402·x | 0.9997 | 0.007          | 81       | 9.0        | 18.70                 |
| <sup>166</sup> Er | 17.2 + 219498·x | 0.9996 | 0.006          | 76       | 15         | ***                   |
| <sup>153</sup> Eu | 3.42 + 230142·x | 0.9996 | 0.008          | 92       | 7.8        | 4.67                  |
| <sup>157</sup> Gd | 3.44 + 120166·x | 0.9996 | 0.007          | 93       | 9.8        | ***                   |
| <sup>165</sup> Ho | 7.23 + 650547·x | 0.9999 | 0.006          | 71       | 18         | ***                   |
| <sup>139</sup> La | 51.3 + 259834·x | 0.9996 | 0.005          | 122      | 8.9        | 87.0                  |
| <sup>175</sup> Lu | 1.09 + 428953·x | 0.9998 | 0.016          | 71       | 18         | 1.32                  |
| <sup>146</sup> Nd | 9.87 + 69876·x  | 0.9995 | 0.009          | 113      | 10         | 87                    |
| <sup>141</sup> Pr | 7.08 + 349674·x | 0.9997 | 0.005          | 92       | 8.7        | ***                   |
| <sup>147</sup> Sm | 4.11 + 70127·x  | 0.9996 | 0.010          | 89       | 14         | 19                    |
| <sup>159</sup> Tb | 3.22 + 597865·x | 0.9999 | 0.006          | 91       | 12         | 3.12                  |
| <sup>169</sup> Tm | 1.30 + 701623·x | 0.9998 | 0.012          | 71       | 15         | ***                   |
| <sup>172</sup> Yb | 1.17 + 201213·x | 0.9996 | 0.011          | 74       | 16         | 7.7                   |
| <sup>89</sup> Y   | 687 + 81024·x   | 0.9991 | 0.014          | 85       | 11         | ***                   |
| <sup>75</sup> As  | 11.2 + 3442·x   | 0.9976 | 0.019          | 86       | 13         | 186.2                 |
| <sup>52</sup> Cr  | 318 + 2979·x    | 0.9992 | 0.063          | 79       | 5.2        | 258                   |
| <sup>51</sup> V   | 164 + 11782·x   | 0.9994 | 0.021          | 86       | 14         | 286.2                 |
| <sup>206</sup> Pb | 227 + 12912·x   | 0.9993 | 0.041          | 97       | 7.5        | 95.2                  |
| <sup>60</sup> Ni  | 183 + 2710·x    | 0.9991 | 0.044          | 114      | 10         | 132                   |
| <sup>55</sup> Mn  | 43.6 + 3541·x   | 0.9989 | 0.059          | 94       | 9.7        | 240.2                 |
| <sup>137</sup> Ba | 664 + 1492·x    | 0.9978 | 0.077          | 82       | 14         | 1126                  |
| <sup>111</sup> Cd | 33.3 + 6169·x   | 0.9996 | 0.018          | 92       | 10         | 0.758                 |
| <sup>63</sup> Cu  | 295 + 6788·x    | 0.9999 | 0.092          | 82       | 9.2        | 173.7                 |
| <sup>98</sup> Mo  | 157 + 12501·x   | 0.9997 | 0.032          | 108      | 4.2        | ***                   |
| <sup>59</sup> Co  | 226 + 2847·x    | 0.9996 | 0.047          | 91       | 7.7        | 42.9                  |
| <sup>202</sup> Hg | 76.9 + 1102·x   | 0.9966 | 0.081          | 118      | 17         | 1.005                 |
| <sup>66</sup> Zn  | 89.7 + 3876·x   | 0.9987 | 0.103          | 92       | 11         | 235                   |
| * Si              | 393 + 5362·x    | 0.9967 | 0.142          | 86       | 16         | 21.30**               |
| * Al              | 88.1 + 4489·x   | 0.9995 | 0.138          | 104      | 9.6        | 13.28**               |
| * Fe              | 118 + 9012·x    | 0.9981 | 0.171          | 93       | 8.4        | 10.49**               |

\* - measured by ICP-OES; \*\* - concentration in %; \*\*\* – not available in SRM NIST 1633c (spiked sample was used for the recovery and RSD tests).

Table S2. Ecological risk indices, the equations, and classification [53].

| Index,<br>Value          | Equation,<br>Class                                    |
|--------------------------|-------------------------------------------------------|
| Enrichment factor        | $EF = [(C_x / R)_{sample}] / [(C_x / R)_{reference}]$ |
| EF < 2                   | - deficiency to minimal enrichment                    |
| 2 ≤ EF < 5               | - moderate enrichment                                 |
| 5 ≤ EF < 20              | - significant enrichment                              |
| 20 ≤ EF < 40             | - very high enrichment                                |
| EF ≥ 40                  | - extremely high enrichment.                          |
| Geoaccumulation index    | $I_{geo} = \log_2 [C_n / (1.5 \times B_n)]$           |
| I <sub>geo</sub> < 0     | - Unpolluted                                          |
| 0 < I <sub>geo</sub> < 1 | - unpolluted to moderately polluted                   |
| 1 ≤ I <sub>geo</sub> < 2 | - moderately polluted                                 |
| 2 ≤ I <sub>geo</sub> < 3 | - moderately to strongly polluted                     |
| 3 ≤ I <sub>geo</sub> < 4 | - strongly polluted                                   |
| 4 ≤ I <sub>geo</sub> < 5 | - strongly to extremely polluted                      |
| I <sub>geo</sub> ≥ 5     | - extremely polluted.                                 |
| Risk index               | $RI = \sum (T_i^i \times C_{is}^i / C_{in}^i)$        |
| RI < 150                 | - low ecological risk                                 |
| 150 ≤ RI < 300           | - moderate ecological risk                            |
| 300 ≤ RI < 600           | - significant ecological risk                         |
| RI ≥ 600                 | - very high ecological risk.                          |

Table S3. Equations used in the risk assessment model [58].

---

*Average Daily Dose*

$$ADD_{ing} = \frac{C \times IngR \times EF \times ED}{BW \times AT} \times CF$$

$$ADD_{inh} = \frac{C \times InhR \times EF \times ED}{PEF \times BW \times AT}$$

$$ADD_{derm} = \frac{C \times SA \times AF \times ABS \times EF \times ED}{BW \times AT} \times CF$$


---

*Non-Carcinogenic Risk*

$$HQ_{i,inh} = \frac{ADD_{i,inh}}{RfD_{i,inh}}$$

$$HQ_{i,derm} = \frac{ADD_{i,derm}}{RfD_{i,derm}}$$

$$HQ_i = HQ_{i,ing} + HQ_{i,inh} + HQ_{i,derm}$$

$$HI = \sum_{i=1}^n HQ_i$$


---

*Carcinogenic Risk*

$$CR_{i,ing} = CDI_{i,ing} \times CSF_{i,ing}$$

$$CR_{i,inh} = CDI_{i,inh} \times CSF_{i,inh}$$

$$CR_{i,derm} = CDI_{i,derm} \times CSF_{i,derm}$$

$$CR_i = CR_{i,ing} + CR_{i,inh} + CR_{i,derm}$$

$$TCR = \sum_{i=1}^n CR_i$$


---

The risk assessment model parameters: C (element concentration), IngR (ingestion rate), InhR (inhalation rate), EF (exposure frequency), ED (exposure duration), PEF (particulate emission factor), SA (skin surface area), AF (adherence factor), ABS (dermal absorption factor), BW (body weight), ATnc (average non-carcinogenic time), ATc (average carcinogenic time), CF (conversion factor), LT (lifetime), RfD (reference dose), CSF (cancer slope factor).

Table S4. Exposure parameters and their distributions in the risk assessment model [58].

| Exposure parameter            | Abbrev.          | Units                                  | Children               | Adults                 | Distribution |
|-------------------------------|------------------|----------------------------------------|------------------------|------------------------|--------------|
| Element concentration         | C                | mg·kg <sup>-1</sup>                    | -                      | -                      | Lognormal    |
| Ingestion rate                | IngR             | mg·day <sup>-1</sup>                   | 200                    | 100                    | Triangular   |
| Inhalation rate               | InhR             | m <sup>3</sup> ·day <sup>-1</sup>      | 7.6                    | 20                     | Lognormal    |
| Exposure frequency            | EF               | day(s)·year <sup>-1</sup>              | 350                    | 350                    | Triangular   |
| Exposure duration             | ED               | year(s)                                | 6                      | 24                     | Point        |
| Particulate emission factor   | PEF              | m <sup>3</sup> ·kg <sup>-1</sup>       | 1.36 × 10 <sup>9</sup> | 1.36 × 10 <sup>9</sup> | Point        |
| Skin surface area             | SA               | cm <sup>2</sup>                        | 2800                   | 5700                   | Point        |
| Adherence factor              | AF               | mg·cm <sup>-2</sup> ·day <sup>-1</sup> | 0.2                    | 0.07                   | Lognormal    |
| Dermal absorption factor      | ABS              | unitless                               | 0.001                  | 0.001                  | Point        |
| Body weight                   | BW               | kg                                     | 15                     | 70                     | Lognormal    |
| Average non-carcinogenic time | AT <sub>nc</sub> | day(s)                                 | 2190                   | 8760                   | Point        |
| Average carcinogenic time     | AT <sub>c</sub>  | day(s)                                 | 25,550                 | 25,550                 | Point        |
| Conversion factor             | CF               | kg·mg <sup>-1</sup>                    | 10 <sup>-6</sup>       | 10 <sup>-6</sup>       | Point        |
| Lifetime                      | LT               | year(s)                                | 70                     | 70                     | Point        |
| Reference dose                | RfD              | mg·kg <sup>-1</sup> ·day <sup>-1</sup> | **                     | **                     | Point        |
| Cancer slope factor           | CSF              | kg·day·mg <sup>-1</sup>                | **                     | **                     | Point        |

Table S5. Reference doses (RfD) ( $\text{mg}\cdot\text{kg}^{-1}\cdot\text{day}^{-1}$ ) and the cancer slope factors (CSF) ( $\text{kg}\cdot\text{day}\cdot\text{mg}^{-1}$ ) of HMs for ingestion, inhalation, and dermal pathway [58].

| Element        | RfD <sub>ing</sub>   | RfD <sub>inh</sub>    | RfD <sub>derm</sub>   | CSF <sub>ing</sub> | CSF <sub>inh</sub> | CSF <sub>derm</sub> |
|----------------|----------------------|-----------------------|-----------------------|--------------------|--------------------|---------------------|
| As (inorganic) | $3 \times 10^{-4}$   | $3 \times 10^{-4}$    | $1.23 \times 10^{-4}$ | 1.5                | 15.1               | 3.66                |
| Ba             | $2 \times 10^{-1}$   | -                     | -                     | -                  | -                  | -                   |
| Cd             | $1 \times 10^{-3}$   | $1 \times 10^{-5}$    | $1 \times 10^{-5}$    | 6.1                | 6.3                | 6.1                 |
| Co             | $2 \times 10^{-2}$   | -                     | $1.6 \times 10^{-2}$  | -                  | -                  | -                   |
| Cr(III)        | 1.5                  | -                     | -                     | -                  | -                  | -                   |
| Cr(VI)         | $3 \times 10^{-3}$   | $2.86 \times 10^{-5}$ | $6 \times 10^{-5}$    | 0.5                | 42                 | 20                  |
| Cu             | $4 \times 10^{-2}$   | $4.02 \times 10^{-2}$ | $1.2 \times 10^{-2}$  | -                  | -                  | -                   |
| Fe             | $7 \times 10^{-1}$   | -                     | -                     | -                  | -                  | -                   |
| Hg(II)         | $3 \times 10^{-4}$   | $8.6 \times 10^{-5}$  | $2.1 \times 10^{-5}$  | -                  | -                  | -                   |
| MeHg           | $1 \times 10^{-4}$   | -                     | -                     | -                  | -                  | -                   |
| Mn             | $1.4 \times 10^{-1}$ | -                     | $1.84 \times 10^{-3}$ | -                  | -                  | -                   |
| Mo             | $5 \times 10^{-3}$   | -                     | -                     | -                  | -                  | -                   |
| Ni             | $2 \times 10^{-2}$   | $2.06 \times 10^{-2}$ | $5.4 \times 10^{-3}$  | -                  | -                  | -                   |
| Pb             | $3.5 \times 10^{-3}$ | $3.52 \times 10^{-3}$ | $5.25 \times 10^{-4}$ | 0.0085             | 0.042              | -                   |
| Sb             | $4 \times 10^{-4}$   | -                     | -                     | -                  | -                  | -                   |
| V              | $7 \times 10^{-3}$   | $7 \times 10^{-3}$    | $7 \times 10^{-5}$    | -                  | -                  | -                   |
| Zn             | $3 \times 10^{-1}$   | $3 \times 10^{-1}$    | $6 \times 10^{-2}$    | -                  | -                  | -                   |

Table S6. REY concentrations (mg/kg) in CFA samples from coal-fired power plants in Serbia (mean±SD).

| REY       | CFA1<br>(Tent A) | CBA2<br>(Tent A*) | CFA3<br>(Tent B) | CBA4<br>(Tent B*) | CFA5<br>(Morava) | CBA6<br>(Morava*) | CFA7<br>(Kolubara) | CBA8<br>(Kolubara*) | CFA9<br>(Kostolac) | CBA10<br>(Kostolac*) |
|-----------|------------------|-------------------|------------------|-------------------|------------------|-------------------|--------------------|---------------------|--------------------|----------------------|
| Ce        | 119±11           | 74±6.8            | 121±11           | 101±9.2           | 92±8.5           | 75±6.9            | 126±12             | 49±4.5              | 78±7.2             | 46±4.3               |
| Dy        | 9.1±0.8          | 5.2±0.5           | 11.2±1           | 6.4±0.6           | 6.6±0.6          | 4.5±0.4           | 11.6±1.0           | 3.5±0.3             | 5.6±0.5            | 3.9±0.4              |
| Er        | 5.9±0.9          | 4.0±0.6           | 6.1±0.9          | 4.8±0.7           | 5±0.7            | 3.5±0.5           | 5.8±0.9            | 2.2±0.3             | 3.5±0.5            | 2.2±0.3              |
| Eu        | 2.1±0.2          | 1.3±0.1           | 2.2±0.2          | 1.4±0.1           | 1.6±0.1          | 1.1±0.1           | 2.3±0.2            | 1.1±0.1             | 1.4±0.1            | 0.8±0.1              |
| Gd        | 9.4±0.9          | 5.5±0.5           | 10.7±1           | 6.8±0.7           | 6.9±0.7          | 4.9±0.5           | 11.2±1.1           | 4.4±0.4             | 5.5±0.5            | 4.6±0.4              |
| Ho        | 1.5±0.3          | 1.1±0.2           | 2.1±0.4          | 1.1±0.2           | 1.0±0.2          | 0.66±0.12         | 2.1±0.4            | 0.5±0.09            | 0.9±0.16           | 0.8±0.14             |
| La        | 64±5.7           | 34±3.0            | 65±5.8           | 48±4.3            | 42±3.7           | 30±2.7            | 64±5.7             | 19±1.7              | 33±2.9             | 25±2.2               |
| Lu        | 0.7±0.13         | 0.3±0.05          | 0.9±0.16         | 0.4±0.07          | 0.4±0.07         | 0.2±0.04          | 0.8±0.14           | 0.3±0.05            | 0.4±0.07           | 0.1±0.02             |
| Nd        | 56±5.4           | 31±2.9            | 59±5.6           | 41±3.9            | 43±4.1           | 28±2.7            | 60±5.8             | 18±1.8              | 33±3.2             | 25±2.4               |
| Pr        | 10.8±0.9         | 5.9±0.5           | 11.1±1.0         | 7.9±0.7           | 8.2±0.7          | 5.2±0.4           | 11.4±1.1           | 3.3±0.3             | 7.1±0.6            | 4.5±0.4              |
| Sm        | 9.5±1.3          | 5.5±0.8           | 10.5±1.5         | 7.0±1.2           | 7.1±1.1          | 4.8±0.7           | 10.9±1.5           | 4.3±0.6             | 5.7±0.8            | 3.1±0.4              |
| Tb        | 1.7±0.2          | 1.2±0.15          | 1.8±0.22         | 1.2±0.14          | 1.07±0.13        | 0.61±0.07         | 1.9±0.23           | 0.53±0.06           | 0.8±0.1            | 0.4±0.05             |
| Tm        | 0.7±0.11         | 0.4±0.06          | 0.9±0.14         | 0.7±0.11          | 0.5±0.08         | 0.2±0.03          | 0.8±0.12           | 0.4±0.06            | 0.4±0.06           | 0.1±0.02             |
| Y         | 39±4.3           | 21±2.3            | 50±5.5           | 30±3.3            | 31±3.5           | 24±2.6            | 48±5.3             | 14±1.5              | 29±3.2             | 17±1.8               |
| Yb        | 4.1±0.6          | 2.6±0.4           | 4.7±0.8          | 3.1±0.5           | 3.4±0.5          | 2.4±0.4           | 4.9±0.8            | 1.4±0.2             | 3±0.5              | 2±0.3                |
| ΣLREY     | 270              | 156               | 279              | 213               | 201              | 149               | 286                | 99                  | 164                | 109                  |
| ΣHREY     | 63               | 36                | 77               | 48                | 49               | 36                | 76                 | 23                  | 43                 | 26                   |
| ΣCritical | 114              | 63                | 129              | 85                | 88               | 62                | 130                | 40                  | 73                 | 49                   |
| %Critical | 34               | 33                | 36               | 32                | 35               | 33                | 36                 | 33                  | 35                 | 36                   |
| Outlook   | 0.90             | 0.81              | 1.00             | 0.80              | 0.90             | 0.79              | 0.96               | 0.78                | 0.88               | 0.99                 |
| ΣREY      | 333              | 192               | 356              | 261               | 250              | 185               | 362                | 122                 | 207                | 135                  |

\* – bottom ash. SD – standard deviation.

Table S7. Pearson correlation coefficients for the REY content in CFA samples from coal-fired power plants in Serbia.

|    | Ce    | Dy    | Er    | Eu    | Gd    | Ho    | La    | Lu    | Nd    | Pr    | Sm    | Tb    | Tm    | Y     |
|----|-------|-------|-------|-------|-------|-------|-------|-------|-------|-------|-------|-------|-------|-------|
| Dy | 0.914 |       |       |       |       |       |       |       |       |       |       |       |       |       |
| Er | 0.886 | 0.924 |       |       |       |       |       |       |       |       |       |       |       |       |
| Eu | 0.906 | 0.935 | 0.884 |       |       |       |       |       |       |       |       |       |       |       |
| Gd | 0.943 | 0.953 | 0.909 | 0.955 |       |       |       |       |       |       |       |       |       |       |
| Ho | 0.907 | 0.976 | 0.904 | 0.946 | 0.961 |       |       |       |       |       |       |       |       |       |
| La | 0.977 | 0.927 | 0.896 | 0.898 | 0.937 | 0.922 |       |       |       |       |       |       |       |       |
| Lu | 0.881 | 0.968 | 0.890 | 0.939 | 0.945 | 0.940 | 0.888 |       |       |       |       |       |       |       |
| Nd | 0.937 | 0.928 | 0.924 | 0.909 | 0.969 | 0.921 | 0.950 | 0.916 |       |       |       |       |       |       |
| Pr | 0.975 | 0.878 | 0.833 | 0.922 | 0.953 | 0.901 | 0.951 | 0.863 | 0.938 |       |       |       |       |       |
| Sm | 0.973 | 0.946 | 0.875 | 0.956 | 0.963 | 0.940 | 0.942 | 0.934 | 0.925 | 0.963 |       |       |       |       |
| Tb | 0.889 | 0.942 | 0.934 | 0.922 | 0.941 | 0.938 | 0.896 | 0.944 | 0.941 | 0.866 | 0.920 |       |       |       |
| Tm | 0.855 | 0.920 | 0.915 | 0.892 | 0.896 | 0.903 | 0.861 | 0.939 | 0.866 | 0.806 | 0.885 | 0.916 |       |       |
| Y  | 0.926 | 0.934 | 0.903 | 0.963 | 0.959 | 0.952 | 0.935 | 0.906 | 0.932 | 0.935 | 0.930 | 0.884 | 0.878 |       |
| Yb | 0.916 | 0.955 | 0.921 | 0.942 | 0.969 | 0.960 | 0.888 | 0.936 | 0.940 | 0.914 | 0.948 | 0.933 | 0.888 | 0.936 |

p &lt; 0.05



Table S8. Enrichment factor (EF) for REY in CFA.

| CFA   | Ce  | Dy  | Er  | Eu  | Gd  | Ho  | La  | Lu  | Nd  | Pr  | Sm  | Tb  | Tm  | Y   | Yb  |
|-------|-----|-----|-----|-----|-----|-----|-----|-----|-----|-----|-----|-----|-----|-----|-----|
| CFA1  | 3.2 | 3.9 | 4.3 | 3.5 | 4.0 | 3.1 | 3.5 | 3.8 | 3.5 | 2.6 | 3.4 | 4.1 | 3.9 | 3.1 | 3.5 |
| CFA2  | 2.3 | 2.7 | 3.4 | 2.6 | 2.8 | 2.7 | 2.2 | 1.9 | 2.3 | 1.6 | 2.3 | 3.6 | 2.7 | 2.0 | 2.6 |
| CFA3  | 2.5 | 3.7 | 3.4 | 2.8 | 3.4 | 3.1 | 2.7 | 3.7 | 2.8 | 2.0 | 2.8 | 3.3 | 3.8 | 3.0 | 3.1 |
| CFA4  | 2.3 | 2.4 | 3.0 | 2.0 | 2.4 | 1.9 | 2.2 | 1.9 | 2.2 | 1.6 | 2.1 | 2.5 | 3.4 | 2.1 | 2.3 |
| CFA5  | 2.0 | 2.4 | 3.0 | 2.3 | 2.4 | 1.9 | 1.9 | 1.8 | 2.2 | 1.6 | 2.1 | 2.1 | 2.3 | 2.1 | 2.4 |
| CFA6  | 2.0 | 1.9 | 2.6 | 1.8 | 2.0 | 1.3 | 1.6 | 1.1 | 1.7 | 1.2 | 1.7 | 1.4 | 1.1 | 1.9 | 2.0 |
| CFA7  | 3.1 | 4.7 | 3.9 | 3.6 | 4.4 | 3.9 | 3.2 | 4.0 | 3.5 | 2.5 | 3.6 | 4.2 | 4.2 | 3.6 | 3.9 |
| CFA8  | 1.8 | 2.1 | 2.3 | 2.6 | 2.6 | 1.4 | 1.5 | 2.3 | 1.6 | 1.1 | 2.2 | 1.8 | 3.2 | 1.6 | 1.7 |
| CFA9  | 1.5 | 1.7 | 1.9 | 1.7 | 1.7 | 1.3 | 1.3 | 1.6 | 1.5 | 1.2 | 1.5 | 1.4 | 1.6 | 1.7 | 1.9 |
| CFA10 | 0.9 | 1.2 | 1.1 | 0.9 | 1.3 | 1.1 | 0.9 | 0.5 | 1.1 | 0.7 | 0.8 | 0.7 | 0.4 | 0.9 | 1.2 |

Table S9. Geoaccumulation index ( $I_{geo}$ ) for REY in CFA.

| CFA   | Ce    | Dy    | Er    | Eu    | Gd    | Ho    | La    | Lu    | Nd    | Pr    | Sm    | Tb    | Tm    | Y     | Yb    |
|-------|-------|-------|-------|-------|-------|-------|-------|-------|-------|-------|-------|-------|-------|-------|-------|
| CFA1  | 0.33  | 0.64  | 0.77  | 0.49  | 0.64  | 0.30  | 0.46  | 0.59  | 0.46  | 0.02  | 0.43  | 0.70  | 0.64  | 0.30  | 0.46  |
| CFA2  | -0.36 | -0.17 | 0.20  | -0.21 | -0.11 | -0.17 | -0.47 | -0.63 | -0.41 | -0.86 | -0.36 | 0.26  | -0.17 | -0.58 | -0.18 |
| CFA3  | 0.36  | 0.94  | 0.82  | 0.55  | 0.83  | 0.68  | 0.49  | 0.95  | 0.53  | 0.06  | 0.57  | 0.78  | 1.00  | 0.65  | 0.68  |
| CFA4  | 0.10  | 0.13  | 0.47  | -0.10 | 0.18  | -0.17 | 0.04  | -0.22 | 0.02  | -0.43 | -0.01 | 0.19  | 0.64  | -0.07 | 0.08  |
| CFA5  | -0.03 | 0.17  | 0.53  | 0.12  | 0.20  | -0.17 | -0.15 | -0.22 | 0.07  | -0.38 | 0.01  | 0.03  | 0.15  | -0.01 | 0.19  |
| CFA6  | -0.34 | -0.38 | 0.04  | -0.45 | -0.30 | -0.92 | -0.61 | -1.22 | -0.53 | -1.04 | -0.55 | -0.79 | -1.17 | -0.39 | -0.32 |
| CFA7  | 0.42  | 0.99  | 0.75  | 0.62  | 0.90  | 0.72  | 0.45  | 0.78  | 0.58  | 0.10  | 0.63  | 0.86  | 0.83  | 0.60  | 0.74  |
| CFA8  | -0.96 | -0.75 | -0.66 | -0.45 | -0.45 | -1.33 | -1.28 | -0.63 | -1.14 | -1.70 | -0.71 | -1.00 | -0.17 | -1.17 | -1.08 |
| CFA9  | -0.27 | -0.06 | 0.02  | -0.10 | -0.13 | -0.47 | -0.51 | -0.22 | -0.28 | -0.58 | -0.31 | -0.40 | -0.17 | -0.14 | 0.04  |
| CFA10 | -1.03 | -0.58 | -0.65 | -0.91 | -0.39 | -0.65 | -0.92 | -1.95 | -0.71 | -1.25 | -1.19 | -1.39 | -2.17 | -0.92 | -0.56 |
| EU    | 0.06  | 0.26  | 0.35  | 0.34  | 0.63  | -0.05 | -0.05 | 0.37  | 0.47  | 0.07  | 0.29  | 0.61  | 0.15  | 0.07  | 0.41  |
| UK    | 0.37  | 0.54  | 0.43  | 0.62  | 0.67  | 0.50  | 0.36  | 0.45  | 0.40  | 0.34  | 0.58  | 0.51  | 0.57  | 0.57  | 0.56  |
| USA   | 0.56  | 0.93  | 0.89  | 1.03  | 1.12  | 0.86  | 0.52  | 0.90  | 0.58  | 0.56  | 0.84  | 0.88  | 1.02  | 1.03  | 0.96  |
| China | 0.90  | 0.95  | 0.91  | 0.74  | 1.23  | 0.82  | 0.86  | 0.95  | 0.89  | 0.84  | 0.96  | 0.93  | 1.00  | 0.87  | 1.00  |
| SA    | 0.82  | 0.79  | 0.69  | 0.74  | 0.95  | 0.59  | 0.91  | 0.59  | 0.70  | 0.77  | 0.85  | 0.68  | 0.64  | 0.88  | 0.51  |
| India | 0.53  | 0.70  | 0.42  | 0.51  | 0.67  | 0.41  | 0.30  | 0.56  | 0.17  | 0.32  | 0.83  | 0.53  | 0.50  | 0.21  | 0.65  |
| World | 0.73  | 0.91  | 1.00  | 0.79  | 1.17  | 0.75  | 0.65  | 0.78  | 0.81  | 0.67  | 0.90  | 0.93  | 1.00  | 0.89  | 0.98  |

Table S10. Potential risk index (RI) for HMs in CFA.

| CFA   | As  | Cd  | Co  | Cr  | Cu | Hg    | Mn  | Ni   | Pb | Zn  | RI   |
|-------|-----|-----|-----|-----|----|-------|-----|------|----|-----|------|
| CFA1  | 154 | 483 | 4.7 | 3.6 | 14 | 63.2  | 0.6 | 11.3 | 26 | 0.8 | 762  |
| CFA2  | 135 | 427 | 4.2 | 4.8 | 18 | 84.8  | 0.5 | 12.8 | 17 | 0.9 | 705  |
| CFA3  | 164 | 547 | 6.6 | 4.6 | 14 | 88.0  | 0.8 | 15.9 | 31 | 1.1 | 872  |
| CFA4  | 97  | 530 | 4.7 | 5.9 | 11 | 48.0  | 0.7 | 20.0 | 29 | 0.8 | 746  |
| CFA5  | 685 | 913 | 6.0 | 1.9 | 14 | 68.8  | 0.7 | 7.6  | 39 | 3.1 | 1740 |
| CFA6  | 132 | 563 | 4.9 | 2.6 | 18 | 32.0  | 0.6 | 7.6  | 21 | 0.9 | 783  |
| CFA7  | 283 | 900 | 8.1 | 3.2 | 19 | 196.0 | 0.6 | 10.7 | 36 | 2.4 | 1459 |
| CFA8  | 95  | 433 | 4.3 | 4.0 | 12 | 80.0  | 0.4 | 8.2  | 10 | 0.9 | 649  |
| CFA9  | 82  | 577 | 5.1 | 2.3 | 19 | 40.8  | 0.8 | 6.9  | 21 | 0.8 | 756  |
| CFA10 | 61  | 483 | 4.6 | 2.1 | 16 | 8.0   | 0.9 | 6.0  | 16 | 0.4 | 598  |

Table S11. Individual risk index (Er) for HMs and REY in CFA.

| REY, HM | Er   |
|---------|------|
| Cd      | 586  |
| As      | 189  |
| Hg      | 71.0 |
| Pb      | 24.7 |
| Cu      | 15.6 |
| Ni      | 10.7 |
| Co      | 5.3  |
| Cr      | 3.5  |
| Zn      | 1.2  |
| Mn      | 0.7  |
| Lu      | 29.2 |
| Tm      | 17.0 |
| Tb      | 16.1 |
| Eu      | 15.3 |
| Ho      | 14.2 |
| Er      | 9.3  |
| Gd      | 8.7  |
| Dy      | 8.7  |
| Yb      | 8.0  |
| Sm      | 7.3  |
| Pr      | 5.3  |
| Nd      | 2.9  |
| Y       | 2.9  |
| Ce      | 1.4  |
| La      | 1.4  |

Table S12. Mean hazard quotients (HQ) for REY in CFA.

| REY | HQa                  | HQc                  |
|-----|----------------------|----------------------|
| Ce  | $6.1 \times 10^{-3}$ | $5.6 \times 10^{-2}$ |
| La  | $2.9 \times 10^{-3}$ | $2.7 \times 10^{-2}$ |
| Nd  | $2.7 \times 10^{-3}$ | $2.5 \times 10^{-2}$ |
| Y   | $2.1 \times 10^{-3}$ | $1.9 \times 10^{-2}$ |
| Pr  | $5.2 \times 10^{-4}$ | $4.8 \times 10^{-3}$ |
| Gd  | $4.8 \times 10^{-4}$ | $4.5 \times 10^{-3}$ |
| Sm  | $4.7 \times 10^{-4}$ | $4.4 \times 10^{-3}$ |
| Dy  | $4.6 \times 10^{-4}$ | $4.3 \times 10^{-3}$ |
| Er  | $3.0 \times 10^{-4}$ | $2.8 \times 10^{-3}$ |
| Yb  | $2.2 \times 10^{-4}$ | $2.0 \times 10^{-3}$ |
| Eu  | $1.1 \times 10^{-4}$ | $9.8 \times 10^{-4}$ |
| Ho  | $8.1 \times 10^{-5}$ | $7.5 \times 10^{-4}$ |
| Tb  | $7.7 \times 10^{-5}$ | $7.2 \times 10^{-4}$ |
| Tm  | $3.5 \times 10^{-5}$ | $3.3 \times 10^{-4}$ |
| Lu  | $3.1 \times 10^{-5}$ | $2.9 \times 10^{-4}$ |

Table S13. Mean hazard quotients (HQ) for HMs in CFA.

| HM | HQa                  | HQc                  |
|----|----------------------|----------------------|
| As | $4.2 \times 10^{-1}$ | $3.9 \times 10^0$    |
| Cr | $9.0 \times 10^{-2}$ | $7.9 \times 10^{-1}$ |
| V  | $3.9 \times 10^{-2}$ | $3.3 \times 10^{-1}$ |
| Pb | $3.4 \times 10^{-2}$ | $3.1 \times 10^{-1}$ |
| Ni | $7.0 \times 10^{-3}$ | $6.5 \times 10^{-2}$ |
| Mn | $6.5 \times 10^{-3}$ | $5.7 \times 10^{-2}$ |
| Ba | $3.7 \times 10^{-3}$ | $3.5 \times 10^{-2}$ |
| Cd | $3.4 \times 10^{-3}$ | $2.9 \times 10^{-2}$ |
| Cu | $3.0 \times 10^{-3}$ | $2.8 \times 10^{-2}$ |
| Mo | $2.8 \times 10^{-3}$ | $2.6 \times 10^{-2}$ |
| Co | $1.3 \times 10^{-3}$ | $1.2 \times 10^{-2}$ |
| Hg | $1.2 \times 10^{-3}$ | $1.1 \times 10^{-2}$ |
| Zn | $3.8 \times 10^{-4}$ | $3.5 \times 10^{-3}$ |

Table S14. Individual mean cancer risk (CR) for HMs in CFA.

| HM | CRa                  | CRc                  |
|----|----------------------|----------------------|
| As | $3.8 \times 10^{-5}$ | $1.5 \times 10^{-4}$ |
| Cr | $2.6 \times 10^{-5}$ | $9.9 \times 10^{-5}$ |
| Cd | $3.0 \times 10^{-6}$ | $1.2 \times 10^{-5}$ |
| Pb | $2.0 \times 10^{-7}$ | $7.8 \times 10^{-7}$ |
